# Supplementary material
Source: publisher figshare collection journal article supplement (https://acs.figshare.com/ndownloader/files/14893976)
Supplement: Supplementary file 1 [file 14893976]

# Supporting Information

## High-Temperature Behavior and Surface Chemistry of Carbide MXenes Studied by Thermal Analysis

Mykola Seredych, Christopher Eugene Shuck, David Pinto, Mohamed Alhabeab, Eliot Precetti, Grayson Deysher, Babak Anasori, Narendra Kurra, and Yury Gogotsi\*

*A.J. Drexel Nanomaterials Institute, and Department of Material Science and Engineering, Drexel University, Philadelphia, PA 19104, USA*

\*Corresponding author. E-mail address: gogotsi@drexel.edu (Y. Gogotsi)

### Safety Measures

It is very important to be fully aware of safety and emergency protocols when working with HF acid or HF containing solutions regardless of their concentrations.

### Hydrofluoric acid



Aqueous HF solutions are clear, colorless, and highly corrosive liquids

**Before working with HF**  
**Read the MSDS**  
**Never work alone with HF**

Storage

- Store in a cool, dry place, and well ventilated place away from incompatible materials.
- Always store in secondary plastic containers made of polyethylene, or polypropylene, or Teflon.

Disposal

- Dispose HF waste in chemically compatible plastic containers.
- All waste containers **MUST** be clearly labeled with hazardous waste tag.
- Prevent cross contaminations.

**Table S1.** Synthesis conditions of multilayer MXene powders discussed in this paper.

| MAX phase                         | Etching methods                                                            | MXene                                                                            |
|-----------------------------------|----------------------------------------------------------------------------|----------------------------------------------------------------------------------|
| Ti <sub>3</sub> AlC <sub>2</sub>  | 5 wt % HF, 24 h, RT                                                        | Ti <sub>3</sub> C <sub>2</sub> T <sub>x</sub> -5HF                               |
|                                   | 10 wt % HF, 18 h, RT                                                       | Ti <sub>3</sub> C <sub>2</sub> T <sub>x</sub> -10HF                              |
|                                   | 30 wt % HF, 4 h, RT                                                        | Ti <sub>3</sub> C <sub>2</sub> T <sub>x</sub> -30HF                              |
|                                   | 5/25/70 wt % HF/H <sub>2</sub> SO <sub>4</sub> /H <sub>2</sub> O, 24 h, RT | Ti <sub>3</sub> C <sub>2</sub> T <sub>x</sub> -HF/H <sub>2</sub> SO <sub>4</sub> |
|                                   | 5/25/70 wt % HF/HCl/H <sub>2</sub> O, 24 h, RT                             | Ti <sub>3</sub> C <sub>2</sub> T <sub>x</sub> -HF/HCl                            |
| Mo <sub>2</sub> Ga <sub>2</sub> C | 50 wt % HF, 120 h, 50°C                                                    | Mo <sub>2</sub> CT <sub>x</sub>                                                  |
| Nb <sub>2</sub> AlC               | 50 wt % HF, 48 h, 50°C                                                     | Nb <sub>2</sub> CT <sub>x</sub>                                                  |

RT – room temperature; HF – hydrofluoric acid; HCl – hydrochloric acid; H<sub>2</sub>SO<sub>4</sub> – sulfuric acid

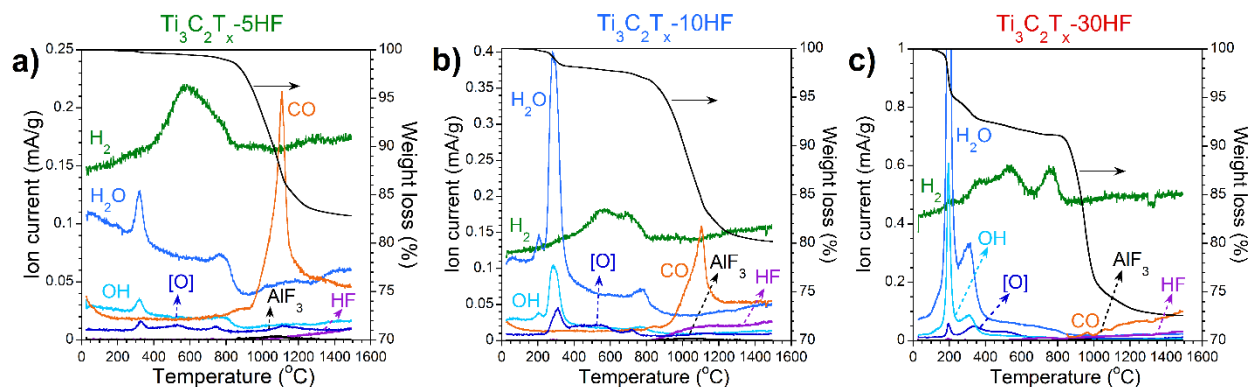

**Figure S1.** Thermal gravimetric (TG) curves with mass spectrometry analysis for Ti<sub>3</sub>C<sub>2</sub>T<sub>x</sub> MXene: Ti<sub>3</sub>C<sub>2</sub>T<sub>x</sub>-5HF (5 wt.% HF for etching) (a), Ti<sub>3</sub>C<sub>2</sub>T<sub>x</sub>-10HF (10 wt.% HF for etching) (b) and Ti<sub>3</sub>C<sub>2</sub>T<sub>x</sub>-30HF (30 wt.% HF for etching) (c). Ion currents for atomic mass unit (amu) 28 (corresponding to either CO or N<sub>2</sub>) is not shown at low temperature (c) due to trace of N<sub>2</sub> in the He tank (see explanation below).

It was noticed that the background ionic current varies for different samples, starting from ambient temperature in the recorded TA-MS profiles. It should be noted that residual nitrogen from the ultra-high purity He tank can contribute to that ionic current, which often causes different backgrounds. Since N<sub>2</sub> and CO have similar *m/z* ratios, and given the high sensitivity for CO, if

the CO gas starts evolving from the surface terminations at high temperatures, the nitrogen background current gets suppressed. Therefore, to avoid confusion, we have excluded the background ionic current profile from nitrogen gas and only focused on CO signal at high temperature regime.

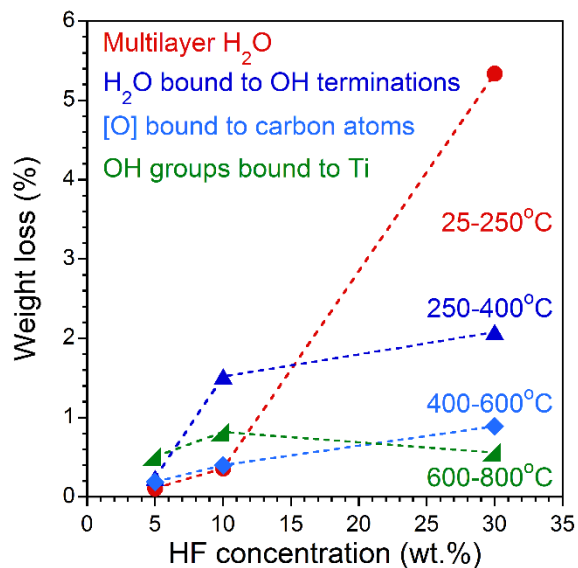

**Figure S2.** The changes in the weight loss after etching with 5, 10 and 30 wt % HF in the different temperature regimes.

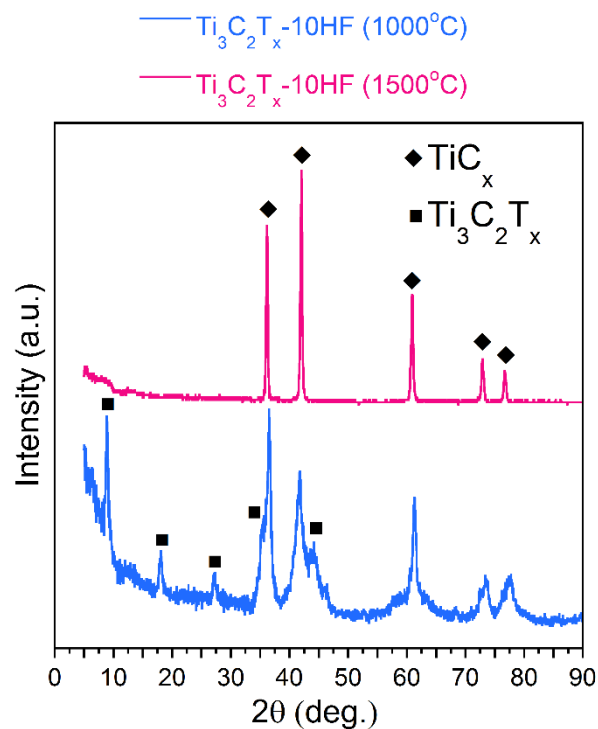

**Figure S3.** X-ray diffraction (XRD) patterns for  $\text{Ti}_3\text{C}_2\text{T}_x$ -10HF obtained by etching  $\text{Ti}_3\text{AlC}_2$  with 10 wt.% HF MXene after heating to  $1000^\circ\text{C}$  and  $1500^\circ\text{C}$ .

The XRD pattern indicates that after initial heating to  $1000^\circ\text{C}$ , MXene is transformed into cubic TiC. This conversion is accompanied by the release of CO species. At  $1500^\circ\text{C}$ , the  $\text{Ti}_3\text{C}_2\text{T}_x$  is completely transformed into cubic carbide, with no evidence of any other phases in the XRD pattern.

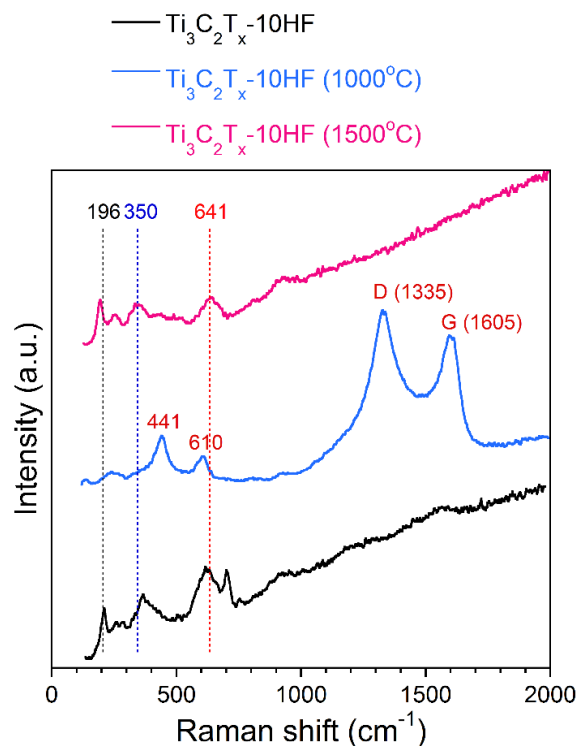

**Figure S4.** Raman spectra of  $\text{Ti}_3\text{C}_2\text{T}_x\text{-10HF}$  samples: pristine (black curve), heating to 1000 °C (blue curve) and 1500 °C (pink curve).

Raman spectrum of pristine  $\text{Ti}_3\text{C}_2\text{T}_x\text{-10HF}$  showed peaks at 213, 280, 618 and 700  $\text{cm}^{-1}$ , which are typical signatures for titanium carbide MXene.<sup>1,2</sup> Thermal treatment of  $\text{Ti}_3\text{C}_2\text{T}_x$  MXene at 1000 °C in the inert atmosphere converted it into rutile ( $\text{TiO}_2$ ), TiC and disordered carbon, as evidenced from the Raman spectrum (blue profile). The peaks at 441 and 610  $\text{cm}^{-1}$  correspond to rutile  $\text{TiO}_2$  phase. The broad D and G bands at 1335 and 1605  $\text{cm}^{-1}$  are due to presence of disordered carbon in the samples treated at 1000 °C. Probably, this structural transformation of  $\text{Ti}_3\text{C}_2\text{T}_x$  MXene can be explained by the disproportionation reaction, based on the following reaction.<sup>3</sup>

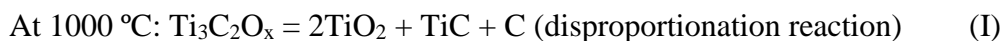

Interestingly, after increasing the annealing temperature to 1500 °C, the oxide phase is reduced by the free carbon, leading to the formation of cubic titanium carbide phase with the liberation of  $\text{CO}_x$

species. Raman signatures of MXene sample annealed at 1500 °C are similar to that of the pristine sample, signifying that bonding changes are being reverted. More interestingly, the peak at 700  $\text{cm}^{-1}$  corresponds out-of-plane of vibrations of carbon atoms in  $\text{Ti}_3\text{C}_2\text{O}(\text{OH})$  and the absence of this peak in the sample annealed at 1500 °C can be attributed to the reduction of oxy/hydroxy functionalities significantly.

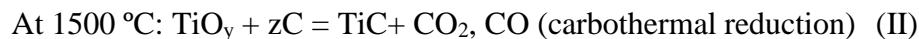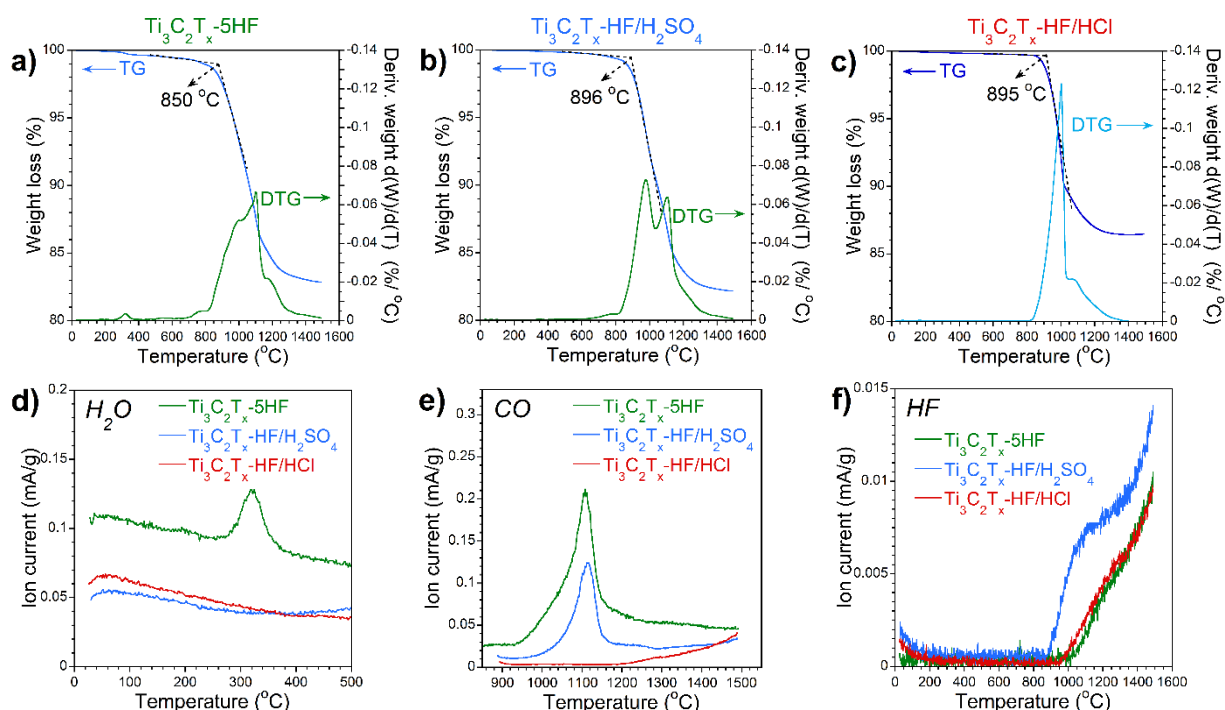

**Figure S5.** Thermal gravimetric (TG) curves with derivatives of the weight losses (DTG) for  $\text{Ti}_3\text{C}_2\text{T}_x$  MXene (a); etched with an acid mixture of HF/ $\text{H}_2\text{SO}_4$  (5 wt % HF, 25 wt %  $\text{H}_2\text{SO}_4$ , 70 wt %  $\text{H}_2\text{O}$ ) (b) HF/HCl (5 wt % HF, 25 wt % HCl, 70 wt %  $\text{H}_2\text{O}$ ) (c), and mass spectrometry analysis for the atomic mass unit (amu) of 18/ $\text{H}_2\text{O}$  (d), 28/CO (e) and 20/HF (f).

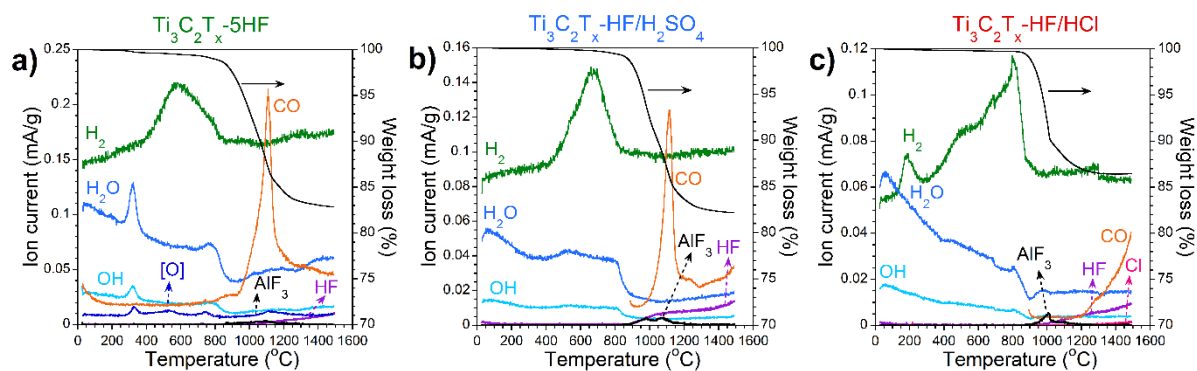

**Figure S6.** Thermal gravimetric (TG) curves with mass spectrometry analysis for  $\text{Ti}_3\text{C}_2\text{T}_x$  MXene obtained by etching (a); with an acid mixture of HF/ $\text{H}_2\text{SO}_4$  (5 wt % HF, 25 wt %  $\text{H}_2\text{SO}_4$ , 70 wt %  $\text{H}_2\text{O}$ ) (b), and HF/HCl (5 wt % HF, 25 wt % HCl, 70 wt %  $\text{H}_2\text{O}$ ) (c).

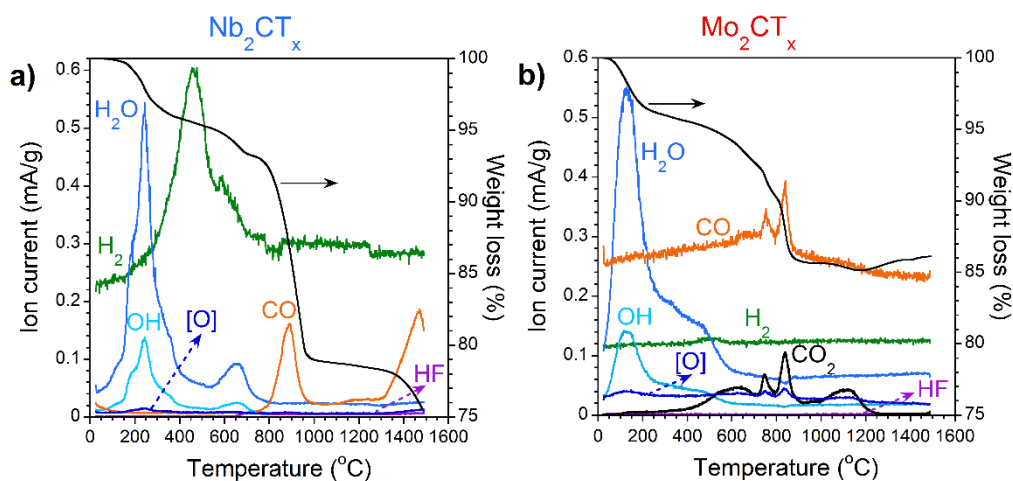

**Figure S7.** Thermal gravimetric (TG) curves with mass spectrometry analysis for multilayer  $\text{Nb}_2\text{CT}_x$  (a) and  $\text{Mo}_2\text{CT}_x$  (b) powders obtained by etching  $\text{Nb}_2\text{AlC}$  and  $\text{Mo}_2\text{Ga}_2\text{C}$  in 50 wt % HF for 48, and 120 h at 50 °C, respectively.

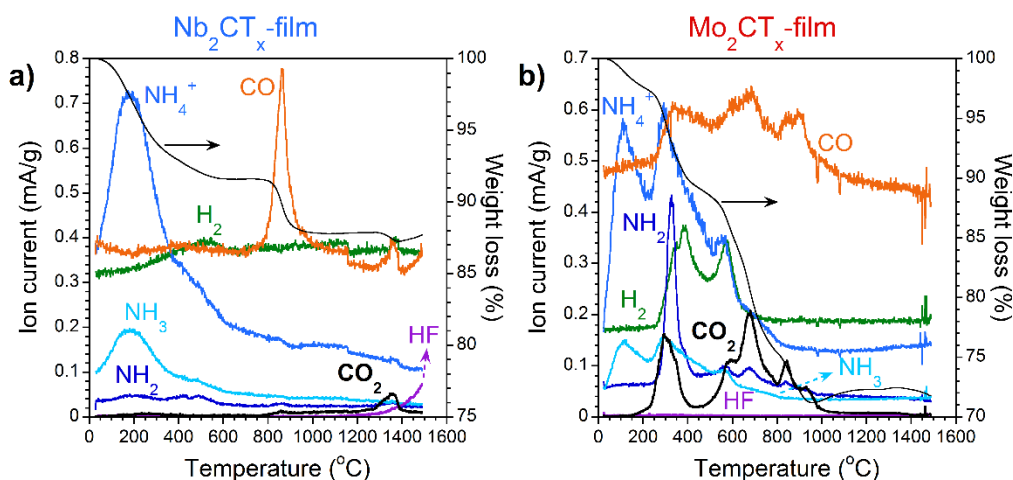

**Figure S8.** Thermal gravimetric (TG) curves with mass spectrometry analysis for  $\text{Nb}_2\text{CT}_x$  (a) and  $\text{Mo}_2\text{CT}_x$  (b) films produced by vacuum assisted filtration of colloidal solution of MXenes delaminated with tetramethylammonium hydroxide (TMAOH).

## REFERENCES

1. Jiang, Q.; Kurra, N.; Alhabeib, M.; Gogotsi, Y.; Alshareef, H. N., All Pseudocapacitive MXene- $\text{RuO}_2$  Asymmetric Supercapacitors. *Adv. Energy Mater.* **2018**, *8*, 1703043.
2. Hu, M.; Li, Z.; Hu, T.; Zhu, S.; Zhang, C.; Wang, X., High-Capacitance Mechanism for  $\text{Ti}_3\text{C}_2\text{T}_x$  MXene by in situ Electrochemical Raman Spectroscopy Investigation. *ACS Nano* **2016**, *10*, 11344-11350.
3. Naguib, M.; Mashtalir, O.; Lukatskaya, M. R.; Dyatkin, B.; Zhang, C.; Presser, V.; Gogotsi, Y.; Barsoum, M. W., One-step Synthesis of Nanocrystalline Transition Metal Oxides on Thin Sheets of Disordered Graphitic Carbon by Oxidation of MXenes. *Chem. Commun.* **2014**, *50*, 7420-7423.
